# Supplementary material for: Open access resource for cellular-resolution analyses of corticocortical connectivity in the marmoset monkey
Source: PubMed Central journal article supplement (PMC7048793; doi:10.1038/s41467-020-14858-0), 2020-02-28
Supplement: 41467_2020_14858_MOESM1_ESM.pdf [file 41467_2020_14858_MOESM1_ESM.pdf]

# Open Access Resource for Cellular-Resolution Analyses of Corticocortical Connectivity in the Marmoset Monkey

Piotr Majka, Shi Bai, Sophia Bakola, Sylwia Bednarek, Jonathan M. Chan, Natalia Jermakow, Laretta Passarelli, David H. Reser, Panagiota Theodoni, Katrina H. Worthy, Xiao-Jing Wang, Daniel K. Wójcik, Partha P. Mitra, Marcello G.P. Rosa

## Supplementary Information

### Contents:

**Supplementary Figure 1:** Sample characteristics with respect to the six different tracers used.

**Supplementary Figure 2:** Relationship between the number of labeled neurons and injection site volume.

**Supplementary Figure 3:** Calculation of geodesic paths and interareal distances.

**Supplementary Figure 4:** Comparison of connectivity distance analysis using different definitions of primary areas.

**Supplementary Figure 5:** Overview of the computational pipeline for mapping the results of the injections into stereotaxic coordinates and for obtaining quantitative connectivity patterns illustrated using an example case.

**Supplementary Figure 6:** Summary of the label maps delineated in both experimental cases as well as in the template, to increase the coregistration accuracy in the expert-assisted reconstruction step.

**Supplementary Figure 7:** The architecture of the <http://www.marmosetbrain.org> portal.

**Supplementary Table 1:** Abbreviations of the names of cortical areas.

**Supplementary Table 2:** Key materials and their sources.

**Supplementary Table 3:** Full list of injections.

### Supplementary References

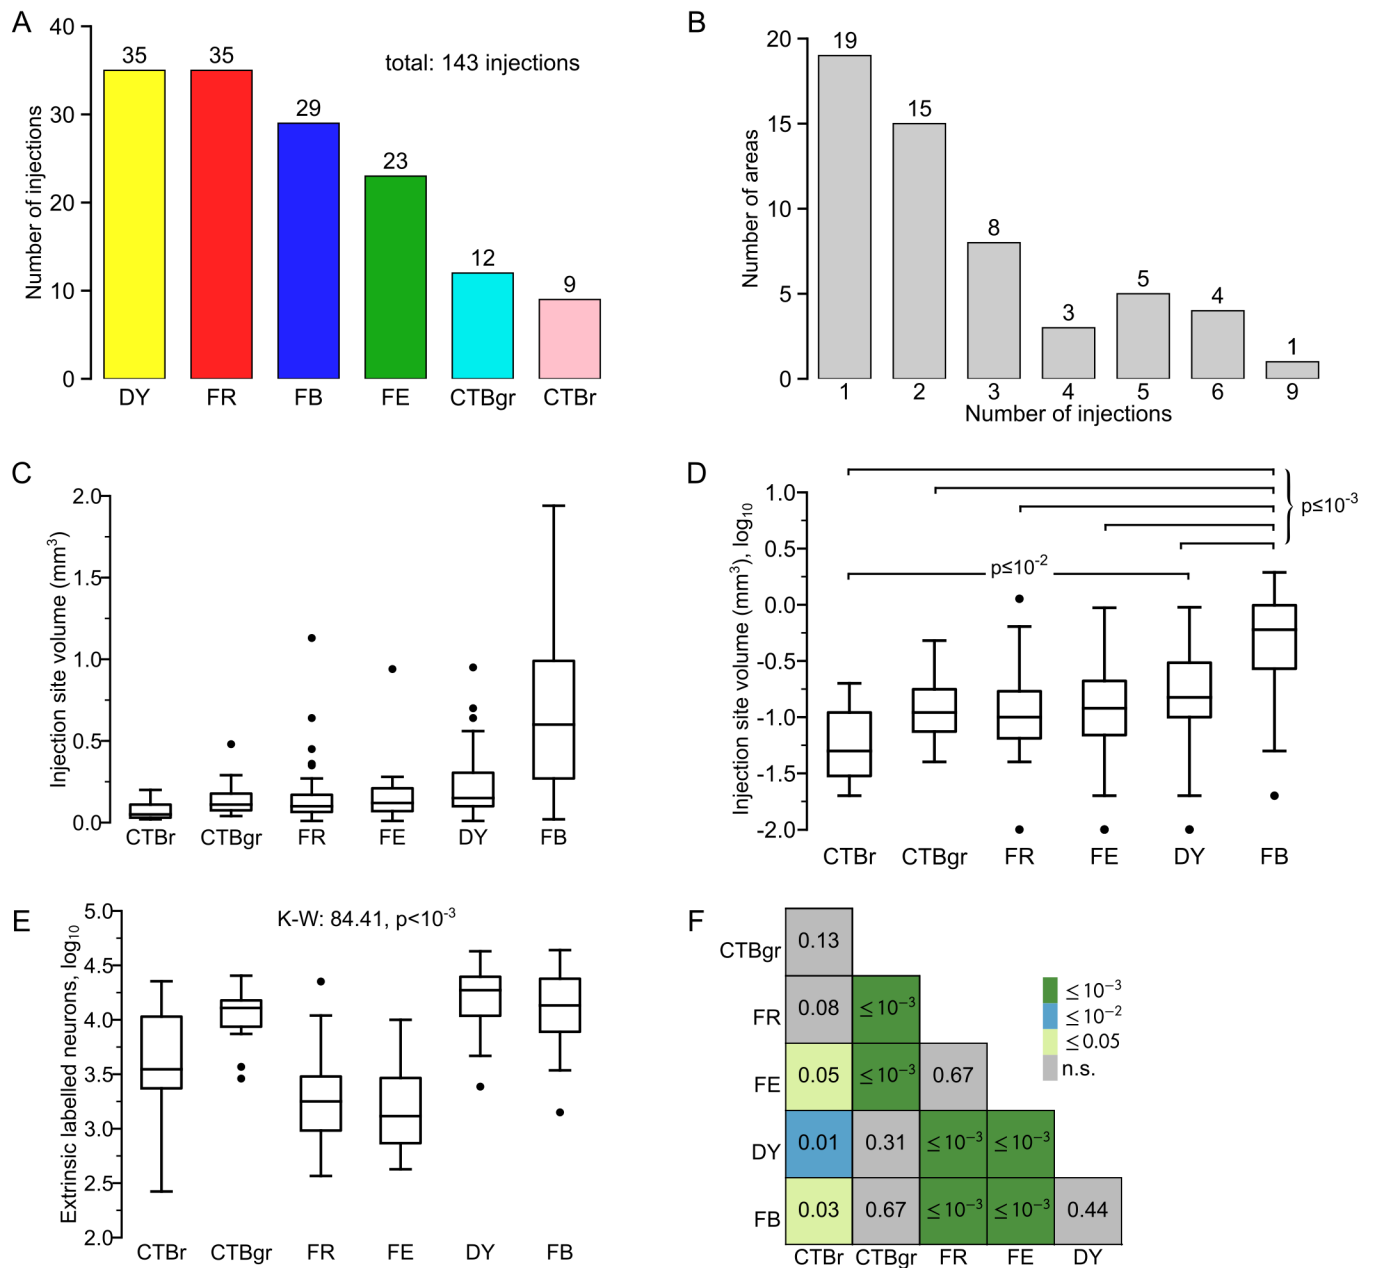

**Supplementary Figure 1.** Sample characteristics with respect to the six different tracers used (related to *Methods*, Surgical procedures). **A:** Numbers of successful injections using the different tracers included in the present sample. Injections with extensive contamination of white matter, or which did not result in long-range transport have been excluded from the sample. **B:** Number of injections centered in different areas. Most areas have received only one or two injections (19 and 15 areas, respectively). Other areas, such as V2 (9 injections), V1 and area 10 (6 injections each) have been injected multiple times. **C, D:** Distribution of injection volumes, in mm<sup>3</sup>, shown in linear scale (**C**) and log<sub>10</sub>-transformed to mitigate the heteroskedasticity (**D**). The volume of the injection site depends on the tracer type (Kruskal-Wallis H test: 38.21, p < 10<sup>-3</sup>). Horizontal bars indicate statistically significant differences according to post-hoc Dunn's test. FB resulted in the largest injection sites, determined histologically<sup>1</sup>, and CTBr the smallest. **E:** Number of neurons forming extrinsic connections, according to the type of tracer (Kruskal-Wallis H test: 84.41, p < 10<sup>-3</sup>). **F:** Pairwise differences between the number of neurons labeled by injection performed with different tracers according to post-hoc Dunn's test. FB and DY tracers tended to label a large number of neurons, together with CTBgr while FR and FE injections result in the smallest number. Box-plots on panels (**C-E**) show order statistics (center line: median; box limits: upper and lower quartiles; whiskers: 1.5 × interquartile range; points: outliers) of the corresponding values. Source data are provided as a Source Data file.

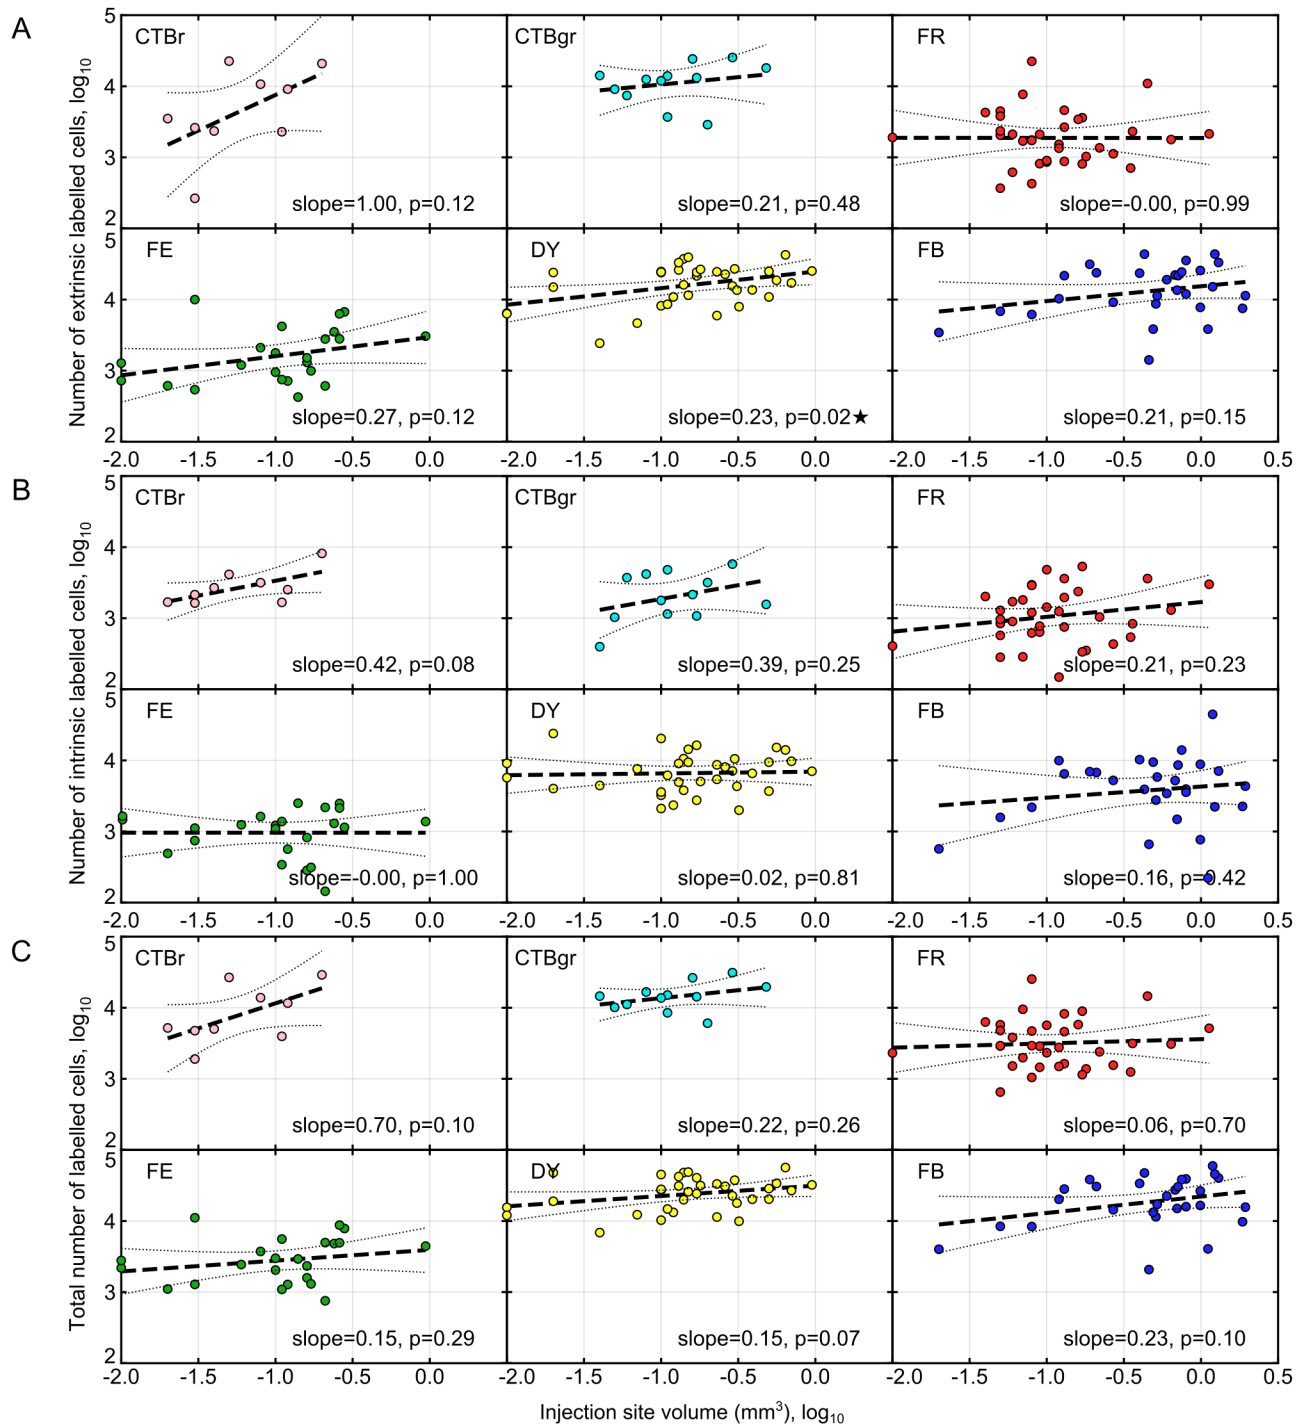

**Supplementary Figure 2.** Relationship between the number of labeled neurons and injection site volume (related to *Methods*, Surgical procedures). Both quantities are log<sub>10</sub>-transformed to mitigate the heteroskedasticity. **A**: extrinsic connections; **B**: intrinsic connections; **C**: all labeled neurons. Each panel represents the regression line (thick, dashed line) and the 95% confidence intervals for the regression slopes (dotted lines). No significant relationship was detected, except for the number of extrinsic neurons as a function of DY injection volume (indicated with a star sign). Source data are provided as a Source Data file.

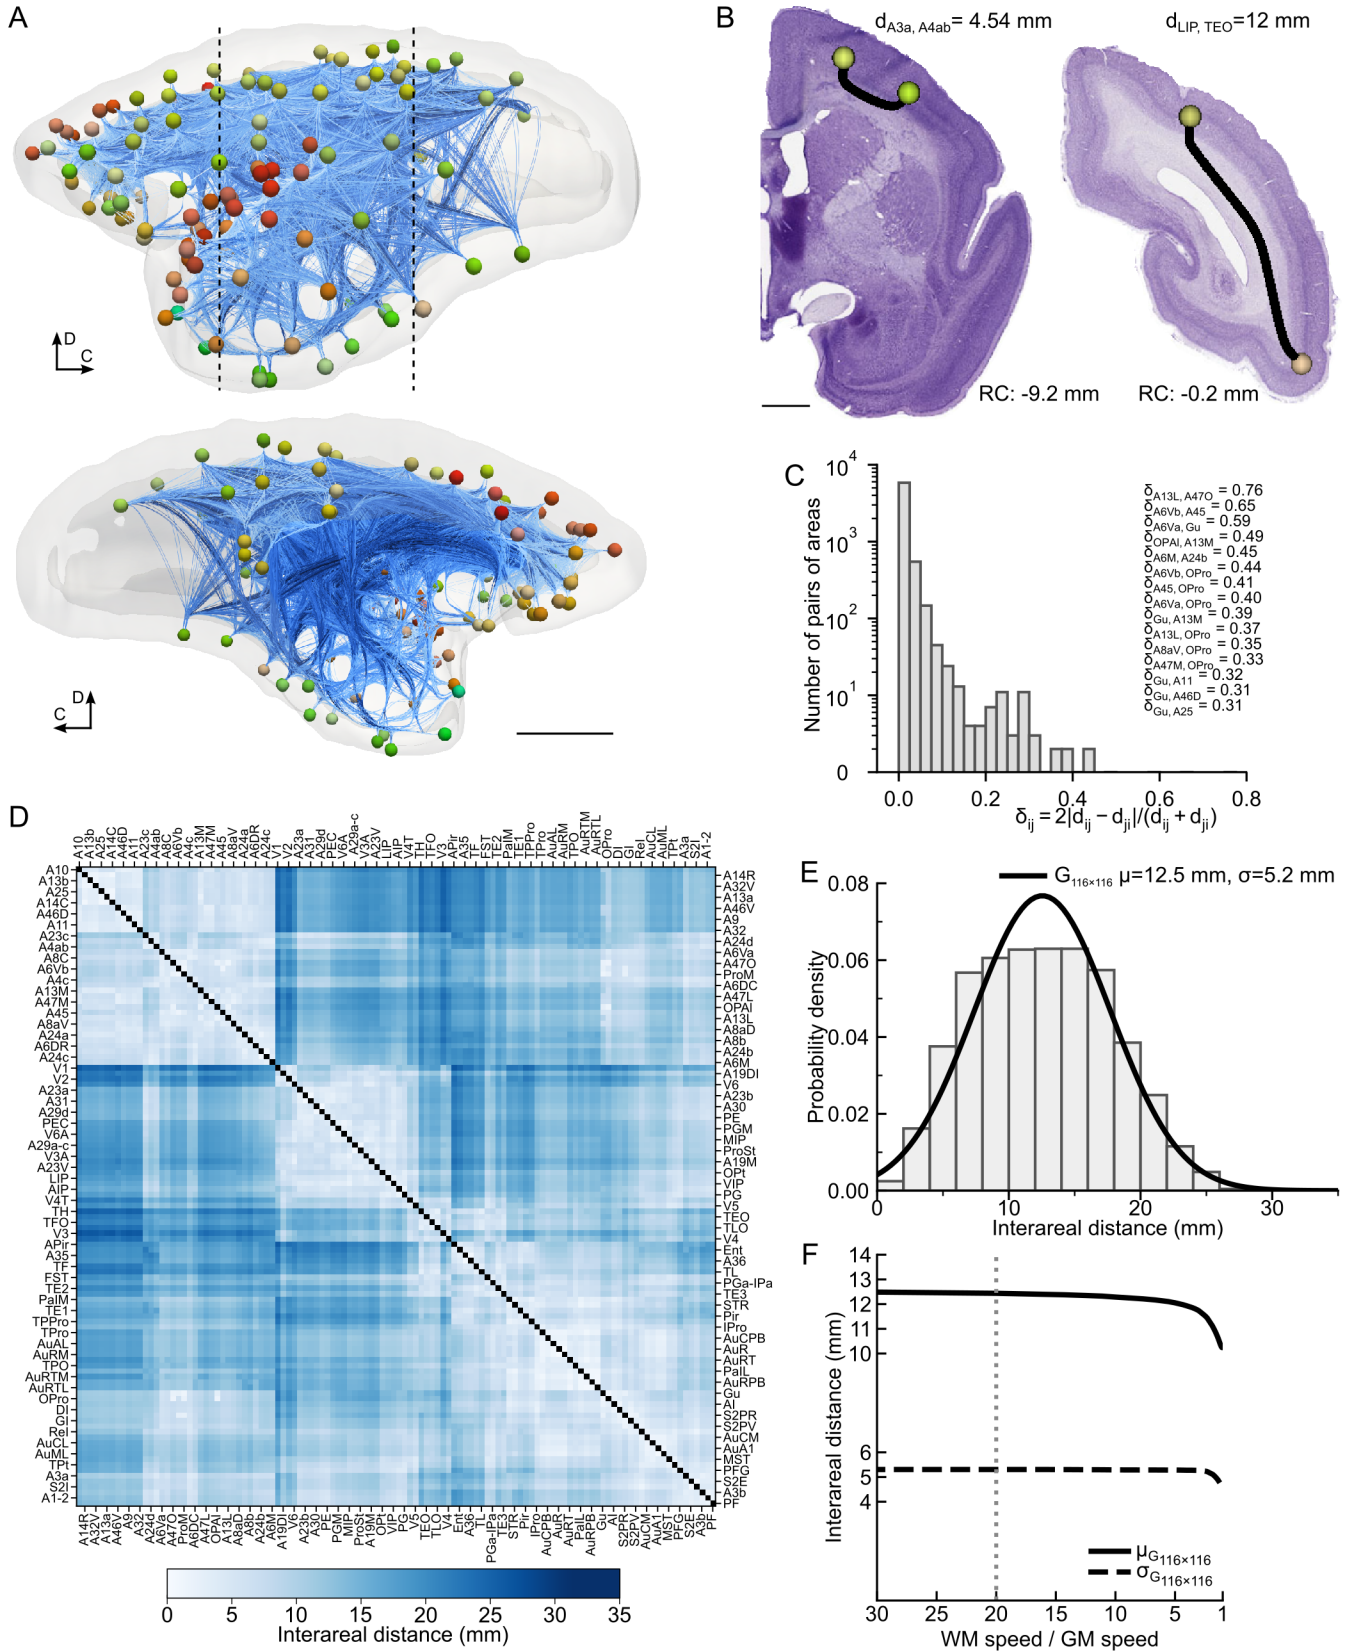

**Supplementary Figure 3.** Legend provided on the next page.

**Legend for the Supplementary Figure 3:** Calculation of geodesic paths and interareal distances (related to *Methods*, Estimation of interareal distances using simulated axonal tracts). **A:** lateral (top) and medial (bottom) projections of the visualizations of simulated axonal tracts (curves in different shades of blue) connecting the centroids of cortical areas (spheres in various colors). The gray, semi-transparent outline depicts the external surface of the cerebral cortex as defined in the reference atlas. Scale bar: 5 mm. **B:** Coronal sections with examples of generated fiber tracts lying approximately in coronal plane. The simulated axonal tract connecting areas 3b and 4ab (left section, 9.2 mm rostral to the interaural line), which are relatively close to one another, forms a characteristic U-shape, while that between areas LIP and TEO (right section, 0.2 mm rostral from the interaural line) passes through deeper parts of the white matter. Scale bar: 2 mm. **C:** Summary of the discrepancies of the lengths of axonal tracts between the centroids of cortical areas calculated in the forward direction (i.e. from area  $i$  to  $j$ ) and in the reverse direction (i.e. from area  $j$  to  $i$ ). In the majority of cases, the discrepancies are minor. Pairs of areas with considerable discrepancies are listed next to the histogram. **D:** Interareal distance matrix (available for download through the <http://www.marmosetbrain.org> portal). Areas are arranged according to hierarchical clustering so that those close to each other are grouped. For details, see *Methods*, 3D reconstruction and mapping procedure. **E:** Histogram of the interareal distances and fitted Gaussian curve. **F:** Comparison of means and standard deviations of distributions of interareal distances obtained with various white matter to gray matter speed ratios ( $f_{WM} / f_{GM}$ ). The results are stable with only a slight decline of the mean distance as the traversal speed in both tissue classes becomes comparable. The dashed gray line indicates the ratio used in the present resource. The abbreviations of areas are provided in Supplementary Table 1. Source data are provided as a Source Data file.

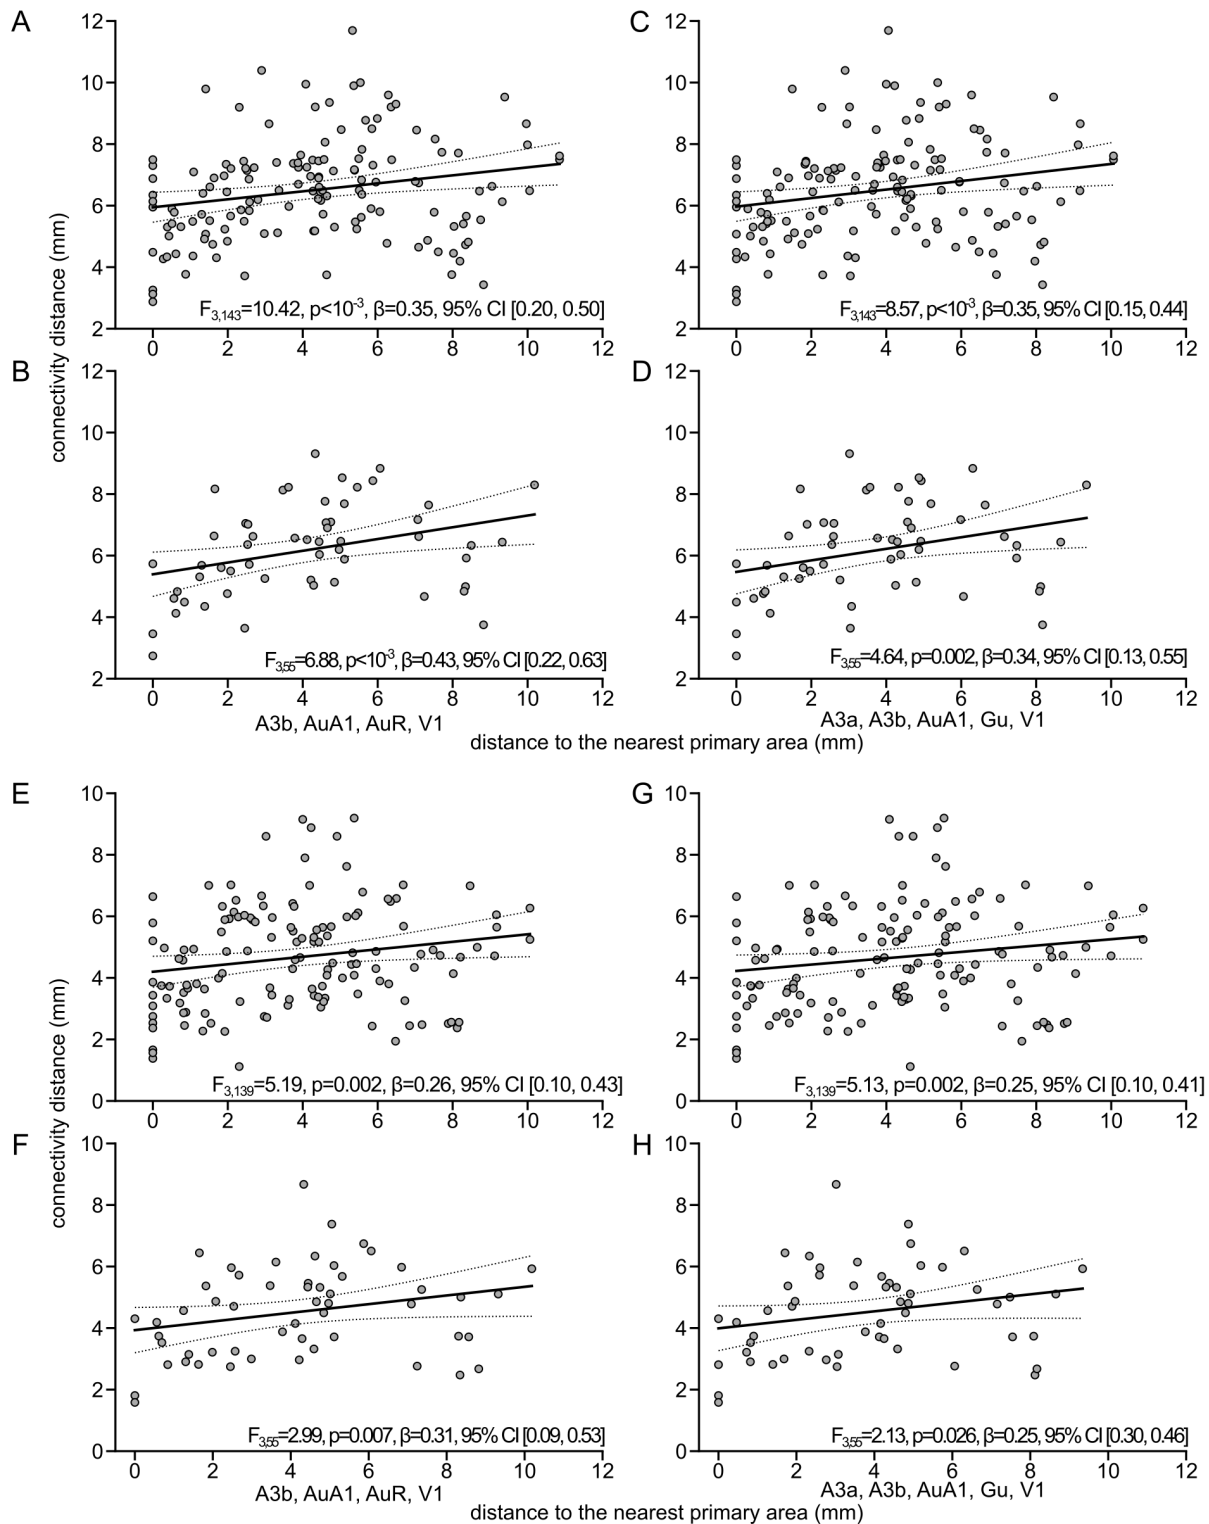

**Supplementary Figure 4.** Comparison of connectivity distance analysis using different definitions of primary areas (related to Fig. 5). Average afferent connection length scales with distance from the borders of primary sensory areas, whether these are defined by histology or function. **A, B:** Analyses in which the locations of individual labeled cells are approximated by locations of centroids of the corresponding areas, based on distance from sensory koniocortex. The average connection length increases with distance from the borders of primary areas whether the analysis is based on individual injections (**A**) or on the averages of the results of injections in the same area (**B**). **C, D:** Analogous analyses, using distance from functionally defined primary sensory areas (A3a, A3b: proprioception and tactile somatic sensation; AuA1: hearing; Gu: gustation; V1: vision). **E-H:** Analyses in which the stereotaxic coordinates of individual neurons are used to calculate distances to the injection sites. In **E** and **G**, each point represents data from one injection; in **F** and **H**, points represent average values for injections in an area. Source data are provided as a Source Data file.

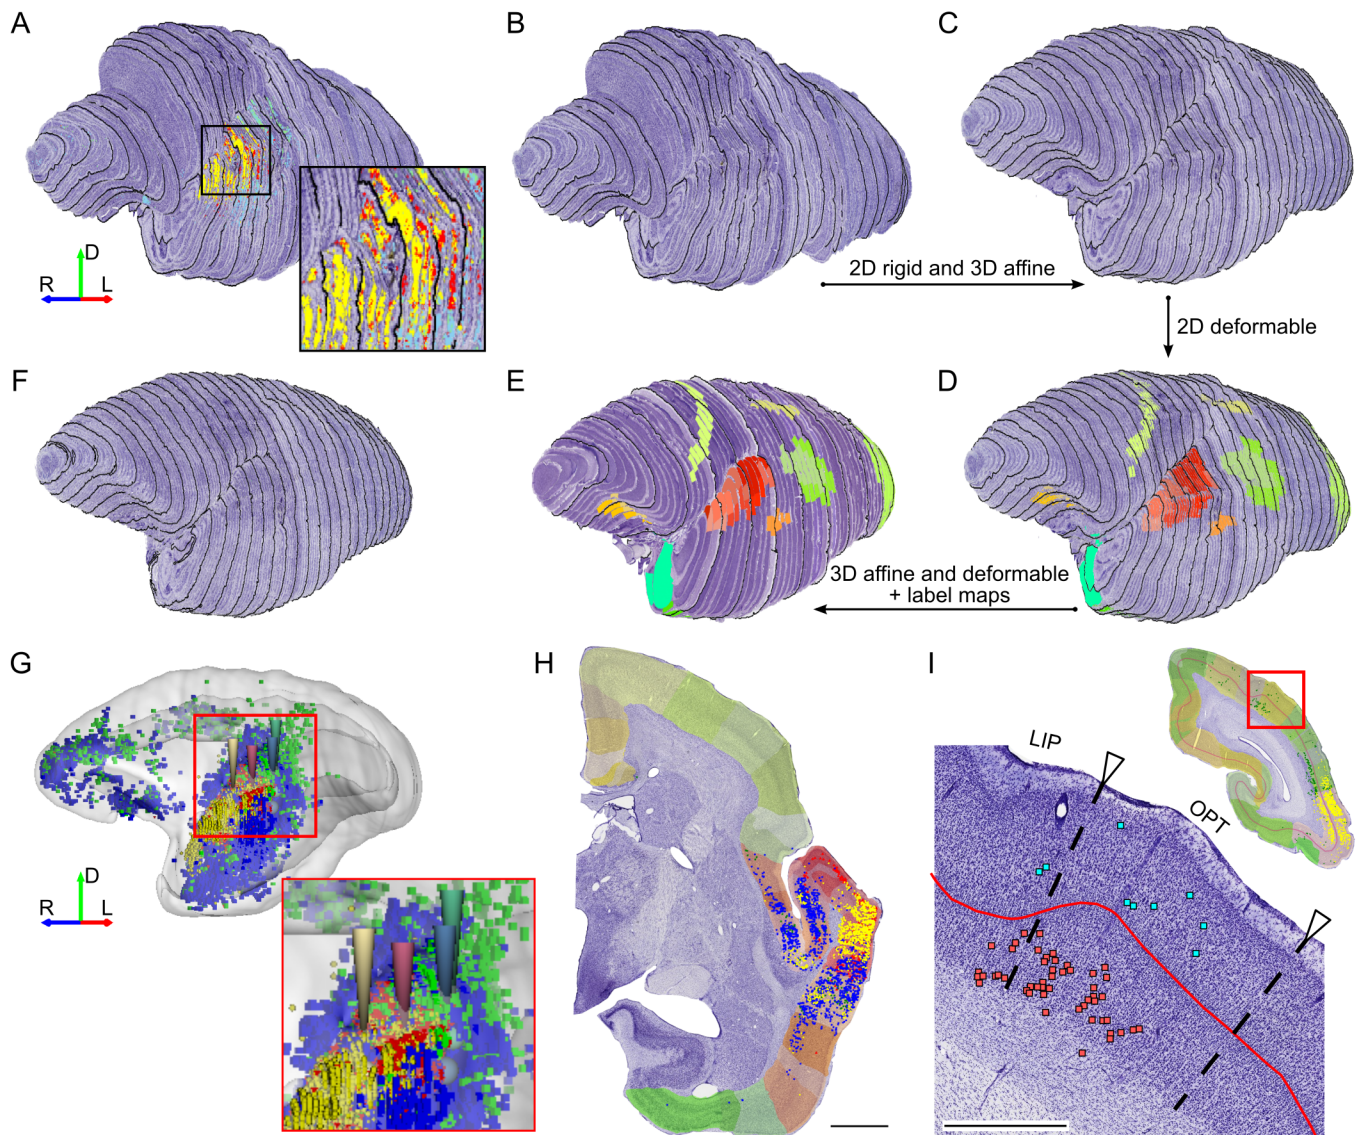

**Supplementary Figure 5.** Overview of the computational pipeline for mapping the results of the injections into stereotaxic coordinates and for obtaining quantitative connectivity patterns illustrated using an example case (CJ122), Related to *Methods*, 3D reconstruction and mapping procedure. **A-G:** Rostrolateral views of a marmoset brain hemisphere undergoing the mapping procedure. Black outlines on every fifth section are provided to better illustrate the general shape of the image stack and are unrelated to the reconstruction process. **A:** alignment of the labeled cells plotted on the fluorescent sections to adjacent Nissl sections. Individual points of different colors correspond to cells labeled by different tracers. The inset presents the vicinity of the DY injection site located in the rostrottemporal auditory area (AuRT). **B:** A stack of 157 Nissl-stained sections ordered rostrocaudally, but not aligned, constitutes the input dataset for the 3D reconstruction. **C:** The stack after the affine reconstruction step which recovers the overall anatomical shape of an individual's brain hemisphere. **D:** The reconstruction after the deformable corrections applied to remove distortions. Different colors represent cytoarchitectural areas delineated manually in this case, to guide the coregistration with the template (see Supplementary Figure 6 for details). In addition, the entire cerebral cortex was outlined as an additional constraint. **E:** 3D visualization of the brain template<sup>2</sup> which constitutes the spatial reference in this study. **F:** The experimental case coregistered to the reference template. Note the similarity to the template in the overall shape and in details. **G:** 3D visualization of the cell mapping results. Points represent individual cells mapped into the stereotaxic space. The tips of the large vertical cones (better visible on the inset) denote the center of mass of individual injections. The gray, semi-transparent outline depicts the external surface of the cerebral cortex. **H:** An example section (7.7 mm rostral to the interaural line) with the parcellation of the cerebral cortex transferred from the reference atlas by the means of registration (color, semi-transparent regions) and labeled cells (color points). Scale bar: 2 mm. **I:** A section (CJ182, 0.2 mm caudal to the interaural line) illustrating the process of dividing the labeled cells into infra- (red points) and supragranular (cyan points). The red curve represents the middle of the layer 4 drawn on sections containing labeled neurons. OPT and LIP are cytoarchitectural areas of the parietal lobe<sup>2</sup> as reconstructed in this individual. Further technical aspects of the reconstruction process have been described previously<sup>3</sup>. Scale bar: 1 mm.

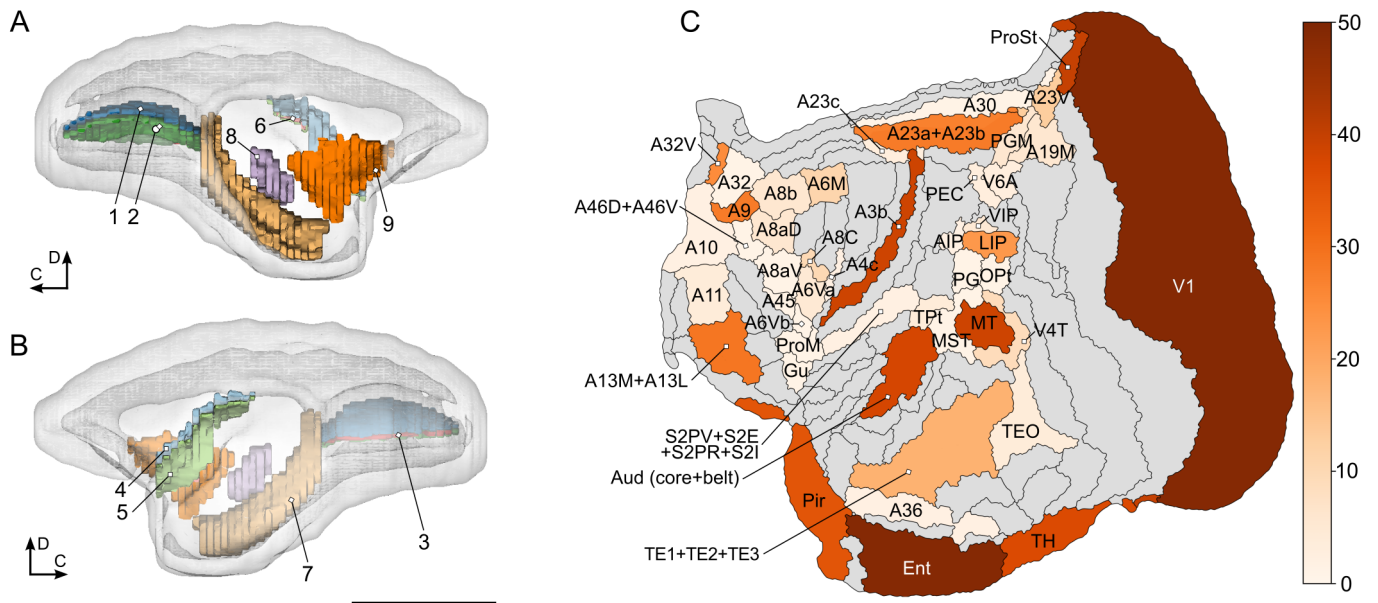

**Supplementary Figure 6.** Summary of the label maps delineated in both experimental cases as well as in the template, to increase the coregistration accuracy in the expert-assisted reconstruction step (related to *Methods*, Expert-assisted registration to cortical areas). **A,B:** Medial and lateral views of the brain outline (gray, transparent model) with major morphological features of the brain shown in different colors: dorsal (1) and ventral (2) banks and the fundus (3) of the calcarine sulcus, medial (4) and lateral (5) banks and the fundus (6) of the lateral sulcus, hippocampus (7), lateral geniculate nucleus (8), and claustrum (9). Scale bar: 10 mm. **C:** Unfolded reconstruction of the cortex (left hemisphere representation; rostral to the left, medial to the top) illustrating how many times, for the entire process of reconstructing all 53 hemispheres, individual cytoarchitectural areas were used to guide the registration process. See Supplementary Table 1 for abbreviations of the areas. Source data are provided as a Source Data file.



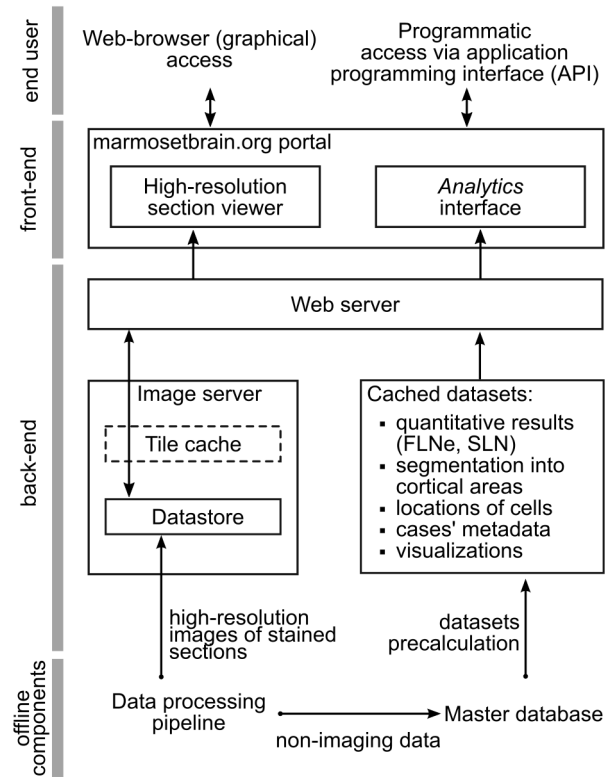

**Supplementary Figure 7.** The architecture of the <http://www.marmosetbrain.org> portal (related to *Methods*, Online Portal).

| <b>Abbrev.</b> | <b>Full Name</b>                                   | <b>Abbrev.</b> | <b>Full Name</b>                                                                  |
|----------------|----------------------------------------------------|----------------|-----------------------------------------------------------------------------------|
| A1/2           | areas 1 and 2 of cortex                            | AuRM           | auditory cortex rostromedial area                                                 |
| A10            | area 10 of cortex                                  | AuRPB          | auditory cortex rostral parabelt                                                  |
| A11            | area 11 of cortex                                  | AuRT           | auditory cortex rostrotemporal                                                    |
| A13L           | area 13 of cortex lateral part                     | AuRTL          | auditory cortex rostrotemporal lateral area                                       |
| A13M           | area 13 of cortex medial part                      | AuRTM          | auditory cortex rostrotemporal medial area                                        |
| A13a           | area 13a of cortex                                 | DI             | dysgranular insular cortex                                                        |
| A13b           | area 13b of cortex                                 | Ent            | entorhinal cortex                                                                 |
| A14C           | area 14 of cortex caudal part                      | FST            | fundus of superior temporal sulcus area of cortex                                 |
| A14R           | area 14 of cortex rostral part                     | GI             | granular insular cortex                                                           |
| A19DI          | area 19 of cortex dorsointermediate part           | Gu             | gustatory cortex                                                                  |
| A19M           | area 19 of cortex medial part                      | IPro           | insular proisocortex                                                              |
| A23V           | area 23 of cortex ventral part                     | LIP            | lateral intraparietal area of cortex                                              |
| A23a           | area 23a of cortex                                 | MIP            | medial intraparietal area of cortex                                               |
| A23b           | area 23b of cortex                                 | MST            | medial superior temporal area of cortex                                           |
| A23c           | area 23c of cortex                                 | OPAL           | orbital periallocortex                                                            |
| A24a           | area 24a of cortex                                 | OPro           | orbital proisocortex                                                              |
| A24b           | area 24b of cortex                                 | OPt            | occipito-parietal transitional area of cortex                                     |
| A24c           | area 24c of cortex                                 | PE             | parietal area PE                                                                  |
| A24d           | area 24d of cortex                                 | PEC            | parietal area PE caudal part                                                      |
| A25            | area 25 of cortex                                  | PF             | parietal area PF (cortex)                                                         |
| A29a-c         | area 29a-c of cortex                               | PFG            | parietal area PFG (cortex)                                                        |
| A29d           | area 29d of cortex                                 | PG             | parietal area PG                                                                  |
| A30            | area 30 of cortex                                  | PGM            | parietal area PG medial part (cortex)                                             |
| A31            | area 31 of cortex                                  | PGa/IPa        | Area PGa andIPa (fundus of superior temporal ventral area)                        |
| A32            | area 32 of cortex                                  | PaIL           | parainsular cortex lateral part                                                   |
| A32V           | area 32 of cortex ventral part                     | PaIM           | parainsular cortex medial part                                                    |
| A35            | area 35 of cortex                                  | Pir            | piriform cortex                                                                   |
| A36            | area 36 of cortex                                  | ProM           | proisocortical motor region (precentral opercular cortex)                         |
| A3a            | area 3a of cortex (somatosensory)                  | ProSt          | prostriate area                                                                   |
| A3b            | area 3b of cortex (somatosensory)                  | ReI            | retroinsular area (cortex)                                                        |
| A45            | area 45 of cortex                                  | S2E            | secondary somatosensory cortex external part                                      |
| A46D           | area 46 of cortex dorsal part                      | S2I            | secondary somatosensory cortex internal part                                      |
| A46V           | area 46 of cortex ventral part                     | S2PR           | secondary somatosensory cortex parietal rostral area                              |
| A47L           | area 47 (old 12) of cortex lateral part            | S2PV           | secondary somatosensory cortex parietal ventral area                              |
| A47M           | area 47 (old 12) of cortex medial part             | STR            | superior temporal rostral area (cortex)                                           |
| A47O           | area 47 (old 12) of cortex orbital part            | TE1            | temporal area TE1 (inferior temporal cortex)                                      |
| A4ab           | area 4 of cortex parts a and b (primary motor)     | TE2            | temporal area TE2 (inferior temporal cortex)                                      |
| A4c            | area 4 of cortex part c (primary motor)            | TE3            | temporal area TE3 (inferior temporal cortex)                                      |
| A6DC           | area 6 of cortex dorsocaudal part                  | TEO            | temporal area TE occipital part                                                   |
| A6DR           | area 6 of cortex dorsorostral part                 | TF             | temporal area TF                                                                  |
| A6M            | area 6 of cortex medial (supplementary motor) part | TFO            | temporal area TF occipital part                                                   |
| A6Va           | area 6 of cortex ventral part a                    | TH             | temporal area TH                                                                  |
| A6Vb           | area 6 of cortex ventral part b                    | TL             | temporal area TL                                                                  |
| A8C            | area 8 of cortex caudal part                       | TLO            | temporal area TL occipital part                                                   |
| A8aD           | area 8a of cortex dorsal part                      | TPO            | temporo-parieto-occipital association area (superior temporal polysensory cortex) |
| A8aV           | area 8a of cortex ventral part                     | TPPro          | temporopolar proisocortex                                                         |
| A8b            | area 8b of cortex                                  | TPro           | temporal proisocortex                                                             |
| A9             | area 9 of cortex                                   | TPt            | temporoparietal transitional area                                                 |
| AI             | agranular insular cortex                           | V1             | primary visual cortex                                                             |
| AIP            | anterior intraparietal area of cortex              | V2             | visual area 2                                                                     |
| APir           | amygdalopiriform transition area                   | V3             | visual area 3 (ventrolateral posterior area)                                      |
| AuA1           | auditory cortex primary area                       | V3A            | visual area 3A (dorsoanterior area)                                               |
| AuAL           | auditory cortex anterolateral area                 | V4             | visual area 4 (ventrolateral anterior area)                                       |
| AuCL           | auditory cortex caudolateral area                  | V4T            | visual area 4 transitional part (middle temporal crescent)                        |
| AuCM           | auditory cortex caudomedial area                   | V5             | visual area 5 (middle temporal area)                                              |
| AuCPB          | auditory cortex caudal parabelt area               | V6             | visual area 6 (dorsomedial area)                                                  |
| AuML           | auditory cortex middle lateral area                | V6A            | visual area 6A (posterior parietal medial area)                                   |
| AuR            | auditory cortex rostral area                       | VIP            | ventral intraparietal area of cortex                                              |

**Supplementary Table 1.** Abbreviations of the names of cortical areas

**Supplementary Table 2: Key materials and their sources**

| REAGENT or RESOURCE                                                                                                                                                                            | SOURCE                                                               | IDENTIFIER                                                                                                                                       |
|------------------------------------------------------------------------------------------------------------------------------------------------------------------------------------------------|----------------------------------------------------------------------|--------------------------------------------------------------------------------------------------------------------------------------------------|
| <b>Chemicals, Peptides, and Recombinant Proteins</b>                                                                                                                                           |                                                                      |                                                                                                                                                  |
| Diamidino Yellow hydrochloride (DY)                                                                                                                                                            | Polysciences Inc                                                     | CAS 87397-07-7                                                                                                                                   |
| Fast Blue (FB)                                                                                                                                                                                 | Polysciences Inc                                                     | CAS 74749-42-1                                                                                                                                   |
| Dextran Tetramethylrhodamine 10,000 MW (Fluoro Ruby, FR)                                                                                                                                       | Life Technologies                                                    | D1817                                                                                                                                            |
| Dextran Fluorescein 10,000 MW (Fluoro Emerald, FE)                                                                                                                                             | Life Technologies                                                    | D1820                                                                                                                                            |
| Cholera Toxin Subunit B (Recombinant), Alexa Fluor™ 488 Conjugate (CTBgr)                                                                                                                      | Life Technologies                                                    | C22841                                                                                                                                           |
| Cholera Toxin Subunit B (Recombinant), Alexa Fluor™ 594 Conjugate (CTBr)                                                                                                                       | Life Technologies                                                    | C22842                                                                                                                                           |
| <b>Deposited Data</b>                                                                                                                                                                          |                                                                      |                                                                                                                                                  |
| Release 1.0 of the Marmoset Brain Connectivity Atlas which includes the results of 143 injections of retrograde tracers                                                                        | This paper                                                           | <a href="http://www.marmosetbrain.org">http://www.marmosetbrain.org</a><br>RRID:SCR_015964                                                       |
| Volumetric digital common marmoset brain template                                                                                                                                              | Majka et al. (2016)                                                  | <a href="http://r.marmosetbrain.org/marmoset_brain_template.zip">http://r.marmosetbrain.org/marmoset_brain_template.zip</a>                      |
| <b>Experimental Models: Organisms/Strains</b>                                                                                                                                                  |                                                                      |                                                                                                                                                  |
| Marmoset monkeys                                                                                                                                                                               | National Non-human Primate Breeding and Research Facility, Australia |                                                                                                                                                  |
| <b>Software and Algorithms</b>                                                                                                                                                                 |                                                                      |                                                                                                                                                  |
| Possum 3D reconstruction framework v. 0.9.3                                                                                                                                                    | Majka and Wójcik (2015)                                              | <a href="https://github.com/pmajka/poSSum">https://github.com/pmajka/poSSum</a>                                                                  |
| Advanced Normalization Tools (ANTS) v. 2.1.0                                                                                                                                                   | Klein et al. (2009), Avants et al. (2011)                            | <a href="http://picsl.upenn.edu/software/ants/">http://picsl.upenn.edu/software/ants/</a><br>RRID:SCR_004757                                     |
| 3d Brain Atlas Reconstructor                                                                                                                                                                   | Majka et al. (2012)                                                  | <a href="https://github.com/pmajka/3dbar">https://github.com/pmajka/3dbar</a><br><a href="http://service.3dbar.org">http://service.3dbar.org</a> |
| Simple ITK v. 1.0.1                                                                                                                                                                            | Kitware                                                              | <a href="https://github.com/SimpleITK/SimpleITK">https://github.com/SimpleITK/SimpleITK</a>                                                      |
| Source code of the Marmoset Brain Connectivity Atlas High-Resolution Section Viewer ( <a href="http://www.marmosetbrain.org">http://www.marmosetbrain.org</a> )                                | This paper                                                           | <a href="https://github.com/Neuroinflab/marmosetbrain.org">https://github.com/Neuroinflab/marmosetbrain.org</a>                                  |
| Source code of the interface for exploration of the quantitative results of retrograde tracer injections ( <a href="http://analysis.marmosetbrain.org">http://analysis.marmosetbrain.org</a> ) | This paper                                                           | <a href="https://github.com/Neuroinflab/analysis.marmosetbrain.org">https://github.com/Neuroinflab/analysis.marmosetbrain.org</a>                |
| Marmoset Brain Connectivity Atlas Application Programming Interface (API)                                                                                                                      | This paper                                                           | <a href="http://analytics.marmosetbrain.org/wiki/api">http://analytics.marmosetbrain.org/wiki/api</a>                                            |
| <b>Other</b>                                                                                                                                                                                   |                                                                      |                                                                                                                                                  |
| PDF version of the book “The Marmoset Brain in Stereotaxic Coordinates” by Paxinos, Watson, Petrides, Rosa and Tokuno                                                                          | Paxinos et al. (2012)                                                | <a href="http://r.marmosetbrain.org/Atlas+Small.pdf">http://r.marmosetbrain.org/Atlas+Small.pdf</a>                                              |
| Protocol for Nissl staining of marmoset brain sections                                                                                                                                         | Katrina Worthy and Kathleen Burman, Monash University                | <a href="http://r.marmosetbrain.org/NisslStain.pdf">http://r.marmosetbrain.org/NisslStain.pdf</a>                                                |
| Protocol for myelin staining of marmoset brain sections using the Gallyas method                                                                                                               | Katrina Worthy, Kathleen Burman and Marcello Rosa, Monash University | <a href="http://r.marmosetbrain.org/Gallyasmethod.pdf">http://r.marmosetbrain.org/Gallyasmethod.pdf</a>                                          |
| Protocol for cytochrome oxidase staining                                                                                                                                                       | Katrina Worthy and Marcello Rosa, Monash University                  | <a href="http://r.marmosetbrain.org/CytochromeOxidase.pdf">http://r.marmosetbrain.org/CytochromeOxidase.pdf</a>                                  |

Supplementary Table 3: Full list of injections.

| #   | Case | Tracer | Hemisphere Injected | Area(s) involved               | Layers involved | Assigned area | Injection site volume (mm <sup>3</sup> ) | Stereotaxic coordinates (mm) |              |              | section | Number of labelled neurons |           |           |
|-----|------|--------|---------------------|--------------------------------|-----------------|---------------|------------------------------------------|------------------------------|--------------|--------------|---------|----------------------------|-----------|-----------|
|     |      |        |                     |                                |                 |               |                                          | Mediolateral                 | Rostrocaudal | Dorsoventral |         | Total                      | Extrinsic | Intrinsic |
| 1.  | CJ19 | FE     | L                   | V3a (100%)                     | 1-6             | ■ V3a         | 0.28                                     | 3.8                          | +1.4         | 15.7         | m6a     | 7,848                      | 6,706     | 1,142     |
| 2.  | CJ19 | FR     | L                   | V2 (100%)                      | 1-5             | ■ V2          | 0.17                                     | 6.3                          | +5.9         | 14.2         | m11c    | 8,951                      | 3,608     | 5,343     |
| 3.  | CJ21 | FB     | L                   | V3a (72%), V6 (22%), LIP (6%)  | 1-5             | □ V3a         | 1.11                                     | 5.0                          | +1.6         | 15.9         | 9b      | 3,914                      | 3,693     | 221       |
| 4.  | CJ21 | DY     | L                   | A19DI (96%), V6 (4%)           | 1-5             | ▣ A19DI       | 0.32                                     | 6.6                          | +3.2         | 15.0         | 12c     | 9,572                      | 7,579     | 1,993     |
| 5.  | CJ36 | FR     | L                   | V2 (100%)                      | 1-6             | ■ V2          | 0.45                                     | 1.0                          | +4.9         | 15.7         | s3a     | 14,559                     | 10,948    | 3,611     |
| 6.  | CJ36 | FB     | L                   | V6 (100%)                      | 1-6             | ■ V6          | 1.86                                     | 3.2                          | +3.4         | 15.9         | s9a     | 9,772                      | 7,518     | 2,254     |
| 7.  | CJ50 | DY     | L                   | PG (79%), OPt (21%)            | 1-6             | □ PG          | 0.23                                     | 7.2                          | -1.4         | 14.7         | c26b    | 33,246                     | 24,572    | 8,674     |
| 8.  | CJ50 | FR     | L                   | V4 (100%)                      | 1-5             | ■ V4          | 0.07                                     | 8.3                          | +0.4         | 13.7         | c23a    | 9,508                      | 7,701     | 1,807     |
| 9.  | CJ51 | DY     | L                   | MST (92%), OPt (8%)            | 1-6             | ▣ MST         | 0.29                                     | 8.3                          | -1.9         | 13.7         | c20b    | 22,642                     | 15,539    | 7,103     |
| 10. | CJ52 | DY     | L                   | PEC (97%), PE (3%)             | 1-6             | ▣ PEC         | 0.50                                     | 2.9                          | -1.3         | 16.7         | c17a    | 28,615                     | 24,918    | 3,697     |
| 11. | CJ52 | FR     | L                   | V6 (100%)                      | 1-6             | ■ V6          | 0.08                                     | 4.1                          | +2.3         | 16.1         | c11b    | 4,701                      | 1,749     | 2,952     |
| 12. | CJ52 | FE     | L                   | V6 (100%)                      | 1-6             | ■ V6          | 0.08                                     | 2.1                          | +2.9         | 16.9         | c10b    | 3,729                      | 2,105     | 1,624     |
| 13. | CJ55 | DY     | L                   | PG (97%), MST (3%)             | 1-6             | ▣ PG          | 0.64                                     | 7.3                          | -1.8         | 13.6         | c24b    | 56,624                     | 42,594    | 14,030    |
| 14. | CJ55 | FR     | L                   | LIP (100%)                     | 1-4             | ■ LIP         | 0.08                                     | 5.9                          | -1.5         | 15.5         | c24a    | 1,045                      | 426       | 619       |
| 15. | CJ55 | FB     | L                   | OPt (67%), PG (21%), MST (12%) | 1-6             | □ OPt         | 0.60                                     | 8.1                          | -0.9         | 13.9         | c22a    | 11,251                     | 9,539     | 1,712     |
| 16. | CJ55 | FE     | L                   | MIP (59%), V3a (41%)           | 1-5             | □ MIP         | 0.16                                     | 3.2                          | +0.1         | 17.0         | c21a    | 1,589                      | 1,305     | 284       |
| 17. | CJ56 | FR     | L                   | V5 (100%)                      | 1-5             | ■ V5          | 0.18                                     | 9.2                          | -3.1         | 11.9         | c24a    | 1,378                      | 1,027     | 351       |
| 18. | CJ56 | FB     | L                   | V5 (100%)                      | 1-6             | ■ V5          | 0.99                                     | 9.0                          | -2.1         | 12.1         | c21a    | 16,566                     | 7,760     | 8,806     |
| 19. | CJ56 | DY     | L                   | V4T (85%), V5 (15%)            | 1-4             | ▣ V4T         | 0.12                                     | 10.7                         | -1.9         | 10.6         | c20b    | 13,227                     | 10,881    | 2,346     |
| 20. | CJ56 | FE     | L                   | V5 (100%)                      | 1-6             | ■ V5          | 0.24                                     | 9.8                          | -0.9         | 11.0         | c18a    | 4,811                      | 3,512     | 1,299     |

|     |      |    |   |                        |     |        |      |      |       |      |      |        |        |       |
|-----|------|----|---|------------------------|-----|--------|------|------|-------|------|------|--------|--------|-------|
| 21. | CJ64 | FE | R | AuML (83%), AuAL (17%) | 1-5 | ■ AuML | 0.17 | 10.5 | -7.1  | 9.1  | c29a | 652    | 496    | 156   |
| 22. | CJ64 | FR | R | AuCM (91%), AuA1 (9%)  | 1-5 | ■ AuCM | 0.17 | 9.1  | -5.7  | 11.2 | c23a | 572    | 404    | 168   |
| 23. | CJ64 | FB | R | V4T (81%), V5 (19%)    | 1-6 | ■ V4T  | 0.70 | 10.4 | -1.2  | 10.0 | c14b | 7,515  | 6,774  | 741   |
| 24. | CJ70 | DY | R | A10 (100%)             | 1-6 | ■ A10  | 0.23 | 1.4  | -19.9 | 11.8 | r2c  | 11,376 | 5,955  | 5,421 |
| 25. | CJ70 | FB | R | A9 (100%)              | 1-5 | ■ A9   | 1.94 | 1.0  | -16.9 | 13.2 | r8a  | 15,672 | 11,329 | 4,343 |
| 26. | CJ70 | FR | R | A8aD (100%)            | 1-5 | ■ A8aD | 0.13 | 4.1  | -16.0 | 13.6 | r10a | 1,629  | 877    | 752   |
| 27. | CJ71 | DY | R | A10 (100%)             | 1-5 | ■ A10  | 0.39 | 1.5  | -19.6 | 10.9 | r2b  | 20,271 | 13,696 | 6,575 |
| 28. | CJ71 | FB | R | A10 (100%)             | 1-5 | ■ A10  | 0.51 | 2.8  | -19.3 | 11.2 | r2d  | 11,457 | 8,699  | 2,758 |
| 29. | CJ71 | FR | R | A47L (99%), A47M (1%)  | 1-6 | ■ A47L | 0.64 | 5.2  | -17.2 | 11.5 | r5b  | 3,078  | 1,778  | 1,300 |
| 30. | CJ73 | FR | R | A10 (100%)             | 2-6 | ■ A10  | 1.13 | 1.1  | -18.3 | 10.9 | r4b  | 2,569  | 1,068  | 1,501 |
| 31. | CJ73 | FB | R | A47L (95%), A8aV(5%)   | 1-6 | ■ A47L | 0.68 | 5.8  | -17.1 | 12.4 | r7b  | 13,687 | 11,082 | 2,605 |
| 32. | CJ73 | DY | R | A8b (100%)             | 1-4 | ■ A8b  | 0.50 | 0.4  | -15.4 | 14.6 | r10b | 10,161 | 5,438  | 4,723 |
| 33. | CJ73 | FE | R | A47L (100%)            | 1-5 | ■ A47L | 0.94 | 8.0  | -15.9 | 10.8 | r11b | 2,217  | 1,527  | 690   |
| 34. | CJ74 | FR | R | A8aV (82%), A47L (18%) | 1-6 | ■ A8aV | 0.04 | 6.3  | -16.0 | 12.2 | r10b | 3,146  | 2,136  | 1,010 |
| 35. | CJ74 | FB | R | A8b (100%)             | 1-6 | ■ A8b  | 0.46 | 1.4  | -15.3 | 14.2 | r12b | 1,034  | 704    | 330   |
| 36. | CJ74 | DY | R | A8b (94%), A24c (6%)   | 1-3 | ■ A8b  | 0.10 | 0.2  | -13.3 | 15.0 | r17b | 5,142  | 4,091  | 1,051 |
| 37. | CJ75 | DY | L | A8aV (82%), A45 (18%)  | 1-6 | ■ A8aV | 0.31 | 7.4  | -14.9 | 12.0 | r14b | 17,897 | 13,575 | 4,322 |
| 38. | CJ75 | FR | L | AuA1 (100%)            | 1-6 | ■ AuA1 | 0.12 | 10.7 | -6.6  | 10.7 | r34b | 2,767  | 1,523  | 1,244 |
| 39. | CJ76 | FE | L | PFG (100%)             | 1-5 | ■ PFG  | 0.10 | 7.5  | -4.7  | 14.6 | c39b | 1,496  | 887    | 609   |
| 40. | CJ76 | DY | L | PFG (97%), AIP (3%)    | 1-6 | ■ PFG  | 0.95 | 6.9  | -3.7  | 15.0 | c36b | 16,142 | 12,621 | 3,521 |

|     |      |    |   |                                  |     |        |      |     |       |      |      |        |        |       |
|-----|------|----|---|----------------------------------|-----|--------|------|-----|-------|------|------|--------|--------|-------|
| 41. | CJ76 | FR | L | PG (100%)                        | 1-6 | ■ PG   | 0.35 | 7.2 | -1.4  | 14.7 | c30b | 623    | 353    | 270   |
| 42. | CJ76 | FB | L | LIP (72%), Opt (28%)             | 1-5 | □ LIP  | 0.52 | 6.7 | -0.2  | 15.4 | c27b | 8,569  | 5,648  | 2,921 |
| 43. | CJ77 | DY | R | PF (85%), PFG (15%)              | 1-3 | ▣ PF   | 0.13 | 7.0 | -5.5  | 15.7 | c39b | 31,067 | 26,118 | 4,949 |
| 44. | CJ77 | FR | R | PG (100%)                        | 1-6 | ■ PG   | 0.05 | 6.7 | -2.2  | 15.6 | c31b | 650    | 368    | 282   |
| 45. | CJ77 | FB | R | Opt (79%), LIP (21%)             | 1-5 | □ Opt  | 0.71 | 7.0 | +0.2  | 15.2 | c25b | 30,344 | 21,753 | 8,591 |
| 46. | CJ78 | FE | L | A4ab (100%)                      | 2-5 | ■ A4ab | 0.01 | 4.7 | -9.4  | 15.3 | r26b | 2,191  | 723    | 1,468 |
| 47. | CJ78 | FB | L | A4ab (100%)                      | 1-4 | ■ A4ab | 0.12 | 3.2 | -8.6  | 17.1 | r28b | 20,233 | 10,286 | 9,947 |
| 48. | CJ78 | DY | L | A3a (78%), A4ab (12%), A3b (10%) | 1-4 | □ A3a  | 0.02 | 6.1 | -8.7  | 15.6 | r28b | 18,986 | 14,969 | 4,017 |
| 49. | CJ80 | FB | R | A23b (75%), A31 (25%)            | 1-6 | □ A23b | 0.21 | 0.5 | -1.8  | 15.5 | c36a | 30,608 | 23,845 | 6,763 |
| 50. | CJ80 | FR | R | A23a (96%), A23b (4%)            | 1-4 | ▣ A23a | 0.09 | 0.8 | -1.4  | 13.6 | c35a | 1,452  | 815    | 637   |
| 51. | CJ80 | DY | R | PGM (100%)                       | 1-6 | ■ PGM  | 0.14 | 0.6 | -0.3  | 14.8 | c32a | 19,929 | 16,134 | 3,795 |
| 52. | CJ81 | FR | L | V2 (63%), V1 (37%)               | 3-5 | □ V2   | 0.06 | 0.8 | +3.4  | 13.3 | c20b | 1,909  | 1,055  | 854   |
| 53. | CJ81 | FB | L | V2 (100%)                        | 1-6 | ■ V2   | 0.27 | 0.7 | +4.8  | 14.4 | c17b | 7,196  | 4,577  | 2,619 |
| 54. | CJ81 | DY | L | V2 (100%)                        | 1-6 | ■ V2   | 0.56 | 1.9 | +6.2  | 15.9 | c14b | 16,950 | 9,348  | 7,602 |
| 55. | CJ81 | FE | L | V2 (100%)                        | 1-5 | ■ V2   | 0.06 | 5.9 | +6.1  | 14.7 | c14b | 1,221  | 600    | 621   |
| 56. | CJ82 | DY | L | V2 (90%), V1 (10%)               | 1-4 | ▣ V2   | 0.11 | 0.3 | +4.0  | 13.3 | c18a | 14,752 | 8,578  | 6,174 |
| 57. | CJ82 | FR | L | V1 (100%)                        | 2-5 | ■ V1   | 0.10 | 0.4 | +5.5  | 13.1 | c14b | 5,673  | 859    | 4,814 |
| 58. | CJ82 | FE | L | V1 (100%)                        | 3   | ■ V1   | 0.14 | 2.4 | +8.4  | 15.4 | c6b  | 2,924  | 424    | 2,500 |
| 59. | CJ83 | DY | L | A8b (100%)                       | 1-6 | ■ A8b  | 0.70 | 0.9 | -14.3 | 14.4 | r13b | 13,440 | 8,574  | 4,866 |
| 60. | CJ84 | FE | L | A23a (98%), A30 (2%)             | 2-3 | ▣ A23a | 0.02 | 0.5 | -1.7  | 13.6 | c17a | 1,104  | 613    | 491   |

|     |       |    |   |                       |     |        |      |     |       |      |      |        |        |        |
|-----|-------|----|---|-----------------------|-----|--------|------|-----|-------|------|------|--------|--------|--------|
| 61. | CJ84  | FB | L | PGM (73%), A23b (27%) | 1-4 | □ PGM  | 0.13 | 0.8 | -0.1  | 12.8 | c15a | 28,158 | 21,697 | 6,461  |
| 62. | CJ84  | FR | L | A19M (100%)           | 1-3 | ■ A19M | 0.07 | 0.7 | +0.3  | 12.6 | c14c | 1,980  | 1,694  | 286    |
| 63. | CJ90  | FR | R | V2 (100%)             | 1-6 | ■ V2   | 0.13 | 2.4 | +7.0  | 15.2 | c9a  | 8,215  | 4,604  | 3,611  |
| 64. | CJ90  | DY | R | V2 (100%)             | 1-3 | ■ V2   | 0.02 | 3.3 | +7.0  | 15.5 | c9a  | 47,948 | 24,027 | 23,921 |
| 65. | CJ94  | DY | R | A8aV (94%), A6Va 6%   | 1-6 | ▣ A8aV | 0.14 | 6.6 | -14.0 | 12.3 | r16b | 24,006 | 18,710 | 5,296  |
| 66. | CJ94  | FR | R | A6DR (100%)           | 1-6 | ■ A6DR | 0.28 | 4.8 | -12.3 | 14.6 | r20b | 746    | 672    | 74     |
| 67. | CJ94  | FB | R | A6M (100%)            | 1-6 | ■ A6M  | 0.80 | 1.3 | -11.5 | 16.0 | r21b | 7,959  | 5,985  | 1,974  |
| 68. | CJ100 | FR | R | A6DR (100%)           | 1-6 | ■ A6DR | 0.09 | 3.4 | -12.7 | 14.6 | r17b | 2,879  | 2,105  | 774    |
| 69. | CJ100 | FE | R | A6Va (91%), A8C (9%)  | 1-5 | ▣ A6Va | 0.26 | 6.6 | -13.2 | 12.8 | r17b | 8,765  | 6,288  | 2,477  |
| 70. | CJ102 | DY | L | A3b (86%), A1/2 (14%) | 1-6 | ▣ A3b  | 0.30 | 8.9 | -10.8 | 12.0 | r12b | 37,537 | 27,016 | 10,521 |
| 71. | CJ108 | FE | R | A8aV (95%), A47L (5%) | 1-5 | ▣ A8aV | 0.21 | 5.8 | -16.0 | 12.7 | r10a | 4,965  | 2,784  | 2,181  |
| 72. | CJ108 | FR | R | A8aD (100%)           | 1-6 | ■ A8aD | 0.22 | 3.9 | -15.4 | 13.7 | r11a | 2,399  | 1,359  | 1,040  |
| 73. | CJ110 | FE | L | A6DR (100%)           | 1-6 | ■ A6DR | 0.26 | 3.8 | -12.5 | 14.6 | r17b | 4,932  | 2,795  | 2,137  |
| 74. | CJ110 | FR | L | A6Va (100%)           | 1-5 | ■ A6Va | 0.27 | 7.5 | -13.1 | 12.2 | r17b | 1,554  | 1,122  | 432    |
| 75. | CJ111 | FE | L | A6Va (100%)           | 1-6 | ■ A6Va | 0.16 | 7.5 | -12.0 | 12.0 | r20a | 2,334  | 1,514  | 820    |
| 76. | CJ111 | FR | L | A6DC (99%), A4ab (1%) | 1-6 | ▣ A6DC | 0.36 | 4.1 | -11.0 | 15.3 | r21b | 3,148  | 2,312  | 836    |
| 77. | CJ112 | FE | L | A6DC (96%), A6M (4%)  | 1-5 | ▣ A6DC | 0.12 | 3.2 | -11.5 | 15.7 | r20a | 5,578  | 4,197  | 1,381  |
| 78. | CJ112 | FR | L | A6Va (100%)           | 1-5 | ■ A6Va | 0.05 | 8.1 | -12.1 | 12.4 | r20a | 2,890  | 2,048  | 842    |
| 79. | CJ113 | FE | L | A6M (100%)            | 1-5 | ■ A6M  | 0.01 | 0.7 | -12.3 | 15.8 | r19a | 2,784  | 1,277  | 1,507  |
| 80. | CJ113 | FR | L | A4ab (100%)           | 1-6 | ■ A4ab | 0.10 | 1.0 | -9.4  | 16.8 | r26a | 2,330  | 900    | 1,430  |

|      |        |    |   |                                      |     |         |      |      |       |      |      |        |        |        |
|------|--------|----|---|--------------------------------------|-----|---------|------|------|-------|------|------|--------|--------|--------|
| 81.  | CJ114  | FR | R | A4ab (100%)                          | 1-6 | ■ A4ab  | 0.16 | 3.4  | -10.5 | 15.3 | r25a | 5,796  | 3,423  | 2,373  |
| 82.  | CJ114  | FE | R | A3b (100%)                           | 1-5 | ■ A3b   | 0.03 | 8.2  | -10.7 | 11.9 | r25a | 1,283  | 539    | 744    |
| 83.  | CJ115  | FE | R | A6DC (100%)                          | 1-6 | ■ A6DC  | 0.10 | 3.3  | -11.8 | 15.0 | r19b | 2,042  | 950    | 1,092  |
| 84.  | CJ115  | FR | R | A4c (96%), A8C (4%)                  | 1-5 | ▣ A4c   | 0.05 | 6.9  | -11.5 | 12.4 | r20b | 2,926  | 2,354  | 572    |
| 85.  | CJ116  | FR | R | A6DR (100%)                          | 1-5 | ■ A6DR  | 0.08 | 4.0  | -13.2 | 14.8 | r16a | 2,926  | 1,727  | 1,199  |
| 86.  | CJ116  | FE | R | A6Va (100%)                          | 1-5 | ■ A6Va  | 0.12 | 7.1  | -12.7 | 12.4 | r18a | 1,279  | 715    | 564    |
| 87.  | CJ122  | DY | R | AuRT (63%), AuAL (37%)               | 1-6 | □ AuRT  | 0.17 | 10.7 | -8.9  | 8.3  | r28b | 24,278 | 21,527 | 2,751  |
| 88.  | CJ122  | FR | R | AuCPB (90%), AuAL (10%)              | 1-4 | ▣ AuCPB | 0.05 | 10.8 | -7.2  | 7.8  | r33a | 5,766  | 4,478  | 1,288  |
| 89.  | CJ122  | FB | R | TPO (75%), PGa/IPa (20%), AuCPB (5%) | 1-5 | □ TPO   | 1.30 | 10.8 | -5.4  | 8.4  | r37b | 40,291 | 33,214 | 7,077  |
| 90.  | CJ122  | FE | R | TPO (79%), AuCL (21%)                | 1-3 | □ TPO   | 0.03 | 10.7 | -5.1  | 9.6  | r38b | 11,112 | 9,998  | 1,114  |
| 91.  | CJ123  | FE | R | A8C (92%), A6Va (8%)                 | 1-5 | ▣ A8C   | 0.21 | 6.3  | -13.1 | 13.7 | r17b | 754    | 610    | 144    |
| 92.  | CJ123  | FR | R | A6DC (100%)                          | 1-6 | ■ A6DC  | 0.06 | 4.0  | -11.3 | 15.0 | r21a | 1,516  | 617    | 899    |
| 93.  | CJ125  | FR | L | A8aV (100%)                          | 1-5 | ■ A8aV  | 0.13 | 6.6  | -15.0 | 12.7 | r14a | 4,612  | 2,657  | 1,955  |
| 94.  | CJ125  | FE | L | A6DR (100%)                          | 1-6 | ■ A6DR  | 0.11 | 4.0  | -13.5 | 14.6 | r17a | 1,090  | 749    | 341    |
| 95.  | CJ146L | DY | L | A23b (55%), A23a (45%)               | 1-6 | □ A23b  | 0.15 | 1.1  | -4.9  | 14.9 | r41a | 48,825 | 39,408 | 9,417  |
| 96.  | CJ146L | FR | L | A23a (90%), A23b (6%), A30 (4%)      | 5-6 | ▣ A23a  | 0.08 | 1.3  | -1.8  | 14.1 | r49a | 12,678 | 11,231 | 1,447  |
| 97.  | CJ146  | FB | R | A23b (92%), A31 (8%)                 | 1-5 | ▣ A23b  | 0.80 | 0.3  | -3.5  | 15.8 | r45a | 19,542 | 17,757 | 1,785  |
| 98.  | CJ148R | DY | L | A32V (100%)                          | 1-5 | ■ A32V  | 0.13 | 0.8  | -15.7 | 9.8  | r6a  | 42,181 | 33,127 | 9,054  |
| 99.  | CJ153  | FR | L | A23b (100%)                          | 3-4 | ■ A23b  | 0.05 | 0.6  | -2.3  | 15.2 | c17d | 4,770  | 3,807  | 963    |
| 100. | CJ164  | DY | L | A8b (100%)                           | 1-4 | ■ A8b   | 0.17 | 0.7  | -15.7 | 13.8 | r6d  | 40,621 | 24,275 | 16,346 |



|      |       |       |   |                                   |     |        |      |     |       |      |      |        |        |        |
|------|-------|-------|---|-----------------------------------|-----|--------|------|-----|-------|------|------|--------|--------|--------|
| 101. | CJ164 | FB    | L | A8b (97%), A24c (3%)              | 1-3 | ▣ A8b  | 0.40 | 0.2 | -14.5 | 14.3 | r8c  | 33,758 | 23,502 | 10,256 |
| 102. | CJ164 | CTBgr | L | A6M (100%)                        | 1-5 | ■ A6M  | 0.20 | 0.7 | -12.9 | 15.4 | r10c | 6,060  | 2,886  | 3,174  |
| 103. | CJ167 | CTBgr | R | A24d (93%), A24c (7%)             | 1-3 | ▣ A24d | 0.05 | 0.3 | -10.5 | 15.7 | r12a | 10,122 | 9,092  | 1,030  |
| 104. | CJ167 | FB    | R | A24d (100%)                       | 1-3 | ■ A24d | 0.02 | 0.6 | -9.5  | 15.8 | r13b | 4,003  | 3,435  | 568    |
| 105. | CJ167 | FR    | R | A24d (72%), A23c (28%)            | 2-3 | □ A24d | 0.01 | 0.8 | -8.6  | 16.0 | r14c | 2,309  | 1,903  | 406    |
| 106. | CJ167 | DY    | R | A23c (69%), A3a (22%), A3a (9%)   | 2-5 | □ A23c | 0.18 | 0.5 | -7.7  | 16.1 | r15d | 31,613 | 26,563 | 5,050  |
| 107. | CJ170 | DY    | R | A6M (100%)                        | 1-5 | ■ A6M  | 0.04 | 0.7 | -12.8 | 15.5 | r9d  | 6,873  | 2,433  | 4,440  |
| 108. | CJ170 | FB    | R | A3a (100%)                        | 1-6 | ■ A3a  | 0.08 | 2.5 | -7.5  | 16.4 | r15d | 8,359  | 6,171  | 2,188  |
| 109. | CJ170 | CTBr  | R | A3b (100%)                        | 1-5 | ■ A3b  | 0.11 | 5.8 | -7.3  | 15.4 | r15d | 3,961  | 2,291  | 1,670  |
| 110. | CJ170 | CTBgr | R | S2E (80%), PF (14%), S2I (6%)     | 1-6 | ▣ S2E  | 0.48 | 7.4 | -6.1  | 13.2 | r17a | 19,648 | 18,085 | 1,563  |
| 111. | CJ173 | DY    | R | A4ab (100%)                       | 1-4 | ■ A4ab | 0.01 | 2.2 | -8.9  | 16.8 | r14c | 15,544 | 6,448  | 9,096  |
| 112. | CJ173 | FB    | R | A1-2 (91%), A3b (7%), and PF (2%) | 1-6 | ▣ A1/2 | 0.19 | 5.5 | -6.6  | 15.2 | r18a | 38,334 | 31,389 | 6,945  |
| 113. | CJ173 | CTBr  | R | PE (63%), A1-2 (37%)              | 1-6 | □ PE   | 0.02 | 2.5 | -5.3  | 17.0 | r19d | 5,197  | 3,512  | 1,685  |
| 114. | CJ173 | CTBgr | R | AIP (55%), PG (45%)               | 1-6 | □ AIP  | 0.04 | 5.9 | -3.0  | 15.5 | r22d | 14,575 | 14,178 | 397    |
| 115. | CJ174 | FB    | R | V1 (100%)                         | 1-6 | ■ V1   | 1.19 | 3.2 | +8.6  | 11.1 | c5a  | 59,682 | 15,148 | 44,534 |
| 116. | CJ174 | CTBgr | R | V1 (100%)                         | 1-3 | ■ V1   | 0.11 | 5.9 | +10.0 | 10.2 | c3a  | 8,496  | 3,697  | 4,799  |
| 117. | CJ174 | CTBr  | R | V1 (100%)                         | 1-3 | ■ V1   | 0.03 | 1.5 | +10.3 | 13.8 | c2d  | 1,899  | 265    | 1,634  |
| 118. | CJ178 | CTBr  | R | A10 (100%)                        | 1-6 | ■ A10  | 0.03 | 2.4 | -18.4 | 12.7 | r3a  | 4,755  | 2,611  | 2,144  |
| 119. | CJ178 | CTBgr | R | A10 (100%)                        | 1-6 | ■ A10  | 0.06 | 3.4 | -18.4 | 12.4 | r3a  | 11,133 | 7,418  | 3,715  |
| 120. | CJ178 | DY    | R | A32 (97%), A9 (3%)                | 2-5 | ▣ A32V | 0.07 | 0.9 | -16.1 | 11.6 | r6a  | 12,267 | 4,664  | 7,603  |

|      |       |       |   |                                    |     |           |      |      |       |      |      |        |        |        |
|------|-------|-------|---|------------------------------------|-----|-----------|------|------|-------|------|------|--------|--------|--------|
| 121. | CJ178 | FB    | R | V1 (100%)                          | 1-6 | ■ V1      | 0.49 | 3.3  | +7.3  | 12.8 | c6d  | 13,301 | 3,837  | 9,464  |
| 122. | CJ180 | FB    | R | AuRT (81%), AuRTL (11%), AuAL (8%) | 1-6 | ▣ AuRT    | 0.99 | 10.5 | -9.4  | 8.2  | r13b | 26,438 | 25,672 | 766    |
| 123. | CJ180 | CTBr  | R | TE3 (100%)                         | 1-4 | ■ TE3     | 0.20 | 10.6 | -6.2  | 5.2  | r16c | 29,029 | 20,867 | 8,162  |
| 124. | CJ180 | CTBgr | R | AuML (77%), AuA1 (23%)             | 1-6 | ▣ AuML    | 0.11 | 10.4 | -5.9  | 10.1 | r17d | 15,109 | 13,961 | 1,148  |
| 125. | CJ180 | DY    | R | TE3 (100%)                         | 1-5 | ■ TE3     | 0.15 | 11.0 | -3.9  | 6.1  | r20a | 25,870 | 11,530 | 14,340 |
| 126. | CJ181 | CTBr  | R | A11 (100%)                         | 1-6 | ■ A11     | 0.05 | 3.5  | -17.5 | 11.0 | r3d  | 26,736 | 22,598 | 4,138  |
| 127. | CJ181 | DY    | R | A47L (95%), A46V (3%), A8aV (2%)   | 1-6 | ▣ A47L    | 0.26 | 5.4  | -17.0 | 12.0 | r4c  | 30,799 | 22,724 | 8,075  |
| 128. | CJ181 | CTBgr | R | AuCM (64%), MST (27%), AuA1 (9%)   | 1-6 | ▣ AuCM    | 0.29 | 9.5  | -4.8  | 11.7 | c21c | 31,190 | 25,416 | 5,774  |
| 129. | CJ181 | FB    | R | TEO (100%)                         | 1-5 | ■ TEO     | 0.75 | 10.9 | +0.3  | 4.5  | c14d | 38,394 | 24,422 | 13,972 |
| 130. | CJ182 | CTBr  | R | PGa/ IPa (100%)                    | 1-3 | ■ PGa/IPa | 0.12 | 10.5 | -5.4  | 7.2  | r18d | 11,626 | 9,106  | 2,520  |
| 131. | CJ182 | CTBgr | R | V4 (88%), V4T (12%)                | 1-4 | ▣ V4      | 0.08 | 10.0 | +1.7  | 9.5  | c13b | 16,665 | 12,489 | 4,176  |
| 132. | CJ182 | DY    | R | V4 (100%)                          | 1-5 | ■ V4      | 0.10 | 10.4 | +1.8  | 7.4  | c13a | 45,148 | 24,780 | 20,368 |
| 133. | CJ800 | DY    | R | A46D (100%)                        | 1-5 | ■ A46D    | 0.01 | 3.3  | -17.5 | 12.6 | r8a  | 12,038 | 6,324  | 5,714  |
| 134. | CJ800 | FB    | R | A47L (90%), A46V (10%)             | 1-3 | ▣ A47L    | 0.05 | 5.7  | -16.9 | 13.1 | r9b  | 8,414  | 6,836  | 1,578  |
| 135. | CJ800 | CTBr  | R | A8aD (100%)                        | 1-6 | ■ A8aD    | 0.04 | 3.6  | -16.1 | 13.1 | r12a | 5,029  | 2,348  | 2,681  |
| 136. | CJ800 | CTBgr | R | A45 (67%), A47L (33%)              | 1-5 | ▣ A45     | 0.16 | 7.5  | -14.5 | 11.1 | r16a | 26,385 | 24,235 | 2,150  |
| 137. | CJ801 | DY    | R | A46D (100%)                        | 1-6 | ■ A46D    | 0.10 | 2.9  | -17.3 | 13.0 | r4d  | 27,249 | 24,013 | 3,236  |
| 138. | CJ801 | CTBgr | R | A6DR (95%), A8aV (5%)              | 1-6 | ▣ A6DR    | 0.10 | 5.0  | -14.1 | 13.5 | r8b  | 13,718 | 11,938 | 1,780  |
| 139. | CJ801 | FB    | R | A8C (68%), A6DC (14%), A6Va (11%)  | 1-6 | ▣ A8C     | 1.23 | 6.1  | -12.7 | 13.6 | r9c  | 45,854 | 43,632 | 2,222  |
| 140. | CJ802 | CTBr  | R | S2E (100%)                         | 1-3 | ■ S2E     | 0.08 | 8.8  | -7.1  | 12.7 | r16c | 13,858 | 10,697 | 3,161  |

|      |       |       |   |                                          |     |                                         |      |      |      |      |      |        |        |       |
|------|-------|-------|---|------------------------------------------|-----|-----------------------------------------|------|------|------|------|------|--------|--------|-------|
| 141. | CJ802 | CTBgr | R | AuML (73%), AuCL (11%), AuA1 (9%),       | 1-6 | <input type="checkbox"/> AuML           | 0.17 | 10.8 | -5.9 | 10.3 | r17d | 14,288 | 13,211 | 1,077 |
| 142. | CJ802 | DY    | R | AIP (80%), PFG (20%)                     | 1-5 | <input checked="" type="checkbox"/> AIP | 0.10 | 6.0  | -3.9 | 15.6 | r20d | 27,933 | 24,346 | 3,587 |
| 143. | CJ802 | FB    | R | PG (36%), MST (28%), PFG (27%), TPT (8%) | 1-5 | <input type="checkbox"/> PG             | 0.43 | 8.0  | -3.2 | 13.7 | r21b | 47,485 | 43,574 | 3,911 |

| Tracers |                                |
|---------|--------------------------------|
| DY      | Diamidino Yellow               |
| FE      | Fluoro-emerald                 |
| FR      | Fluoro-ruby                    |
| FB      | Fast blue                      |
| CTBgr   | Cholera Toxin Subunit B, 488nm |
| CTBr    | Cholera Toxin Subunit B, red   |

| Involvement of adjacent areas                                                                                                               |
|---------------------------------------------------------------------------------------------------------------------------------------------|
| <input checked="" type="checkbox"/> Injection confined entirely within a single area.                                                       |
| <input checked="" type="checkbox"/> $\geq 80\%$ of the injection within a single area. Involvement of additional areas cannot be ruled out. |
| <input type="checkbox"/> $< 80\%$ of the injection within a single area. Invasion of adjacent areas is very likely.                         |

| Stereotaxic coordinates |                                  |                            |
|-------------------------|----------------------------------|----------------------------|
| Mediolateral            | Lateral to the midsagittal plane |                            |
| Rostrocaudal            | Negative                         | Rostral to interaural line |
|                         | Positive                         | Caudal to interaural line  |
| Dorsoventral            | Dorsal to the interaural line    |                            |

## Supplementary References

1. Condé, F. Further studies on the use of the fluorescent tracers fast blue and diamidino yellow: effective uptake area and cellular storage sites. *J. Neurosci. Methods* **21**, 31–43, (1987).
2. Paxinos, G., Watson, C., Petrides, M., Rosa, M. & Tokuno, H. *The marmoset brain in stereotaxic coordinates* (Academic Press, 2012), 1st ed.
3. Majka, P. *et al.* Towards a comprehensive atlas of cortical connections in a primate brain: Mapping tracer injection studies of the common marmoset into a reference digital template. *J. Comp. Neurol.* **524**, 2161–2181, (2016).
